# Supplementary material for: Cooperative multiple interactions of donor–π–acceptor dyes enhance the efficiency and stability of perovskite solar cells
Source: Royal Society of Chemistry journal article supplement (doi:10.1039/d3cp00704a), 2023-01-01
Supplement: d3cp00704a1.pdf [file d3cp00704a1.pdf]

## Electronic Supplementary Information

# Cooperative multiple interactions of donor- $\pi$ -acceptor dyes enhance the efficiency and stability of perovskite solar cells

Xiufang Hou,<sup>\*‡ab</sup> Weiyi Zhang<sup>‡b</sup> and Quan-Song Li<sup>\*b</sup>

<sup>a</sup> Shaanxi Key Laboratory of Chemical Reaction Engineering, College of Chemistry and Chemical Engineering, Yan'an University, Yan'an, Shaanxi 716000, China

<sup>b</sup> Key Laboratory of Cluster Science of Ministry of Education, Beijing Key Laboratory of Photoelectronic/Electrophotonic Conversion Materials, School of Chemistry and Chemical Engineering, Beijing Institute of Technology, Beijing 100081, China

## Contents

**Fig. S1** Geometries and adsorption energies of PMs on MAPbI<sub>3</sub>

S2

**Fig. S2** Structures details of PM@MAPbI<sub>3</sub> interfaces S3

**Fig. S3** Molecular dynamics of the water interaction with PM@MAPbI<sub>3</sub> S4

**Fig. S4** Evolution of the O atom heights in water for MAPbI<sub>3</sub>/PM/H<sub>2</sub>O systems S5

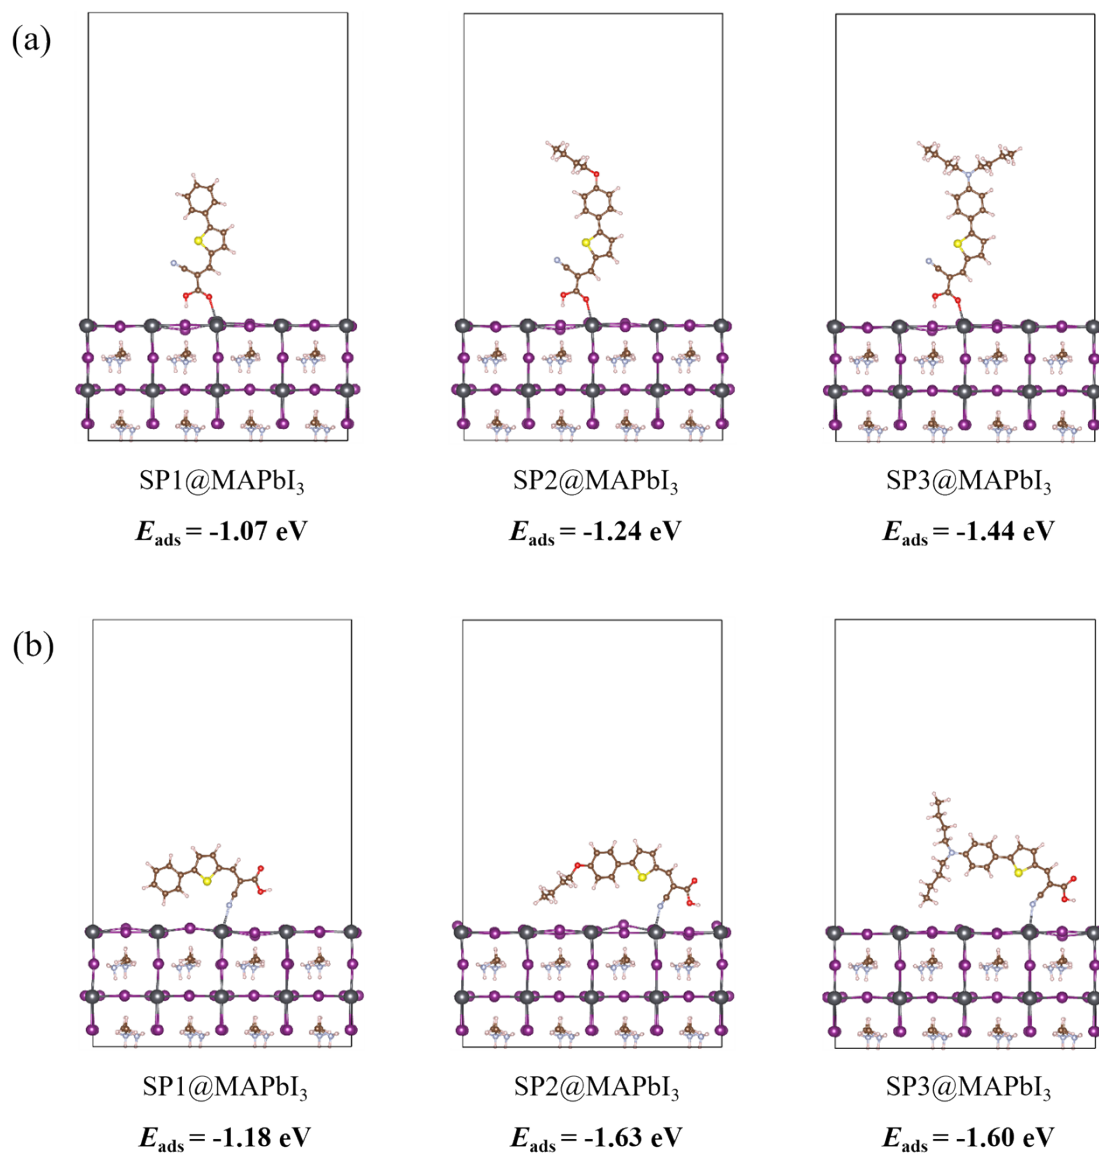

**Fig. S1.** Interfacial structures (a) by the vertical pattern and (b) by the lateral pattern of SP1@MAPbI<sub>3</sub>, SP2@MAPbI<sub>3</sub>, and SP3@MAPbI<sub>3</sub>. The corresponding adsorption energy ( $E_{\text{ads}}$ ) is labeled below. Colour code: red, O; blue, N; bright yellow, S; brown, C; white, H; purple, I; and leaden, Pb.

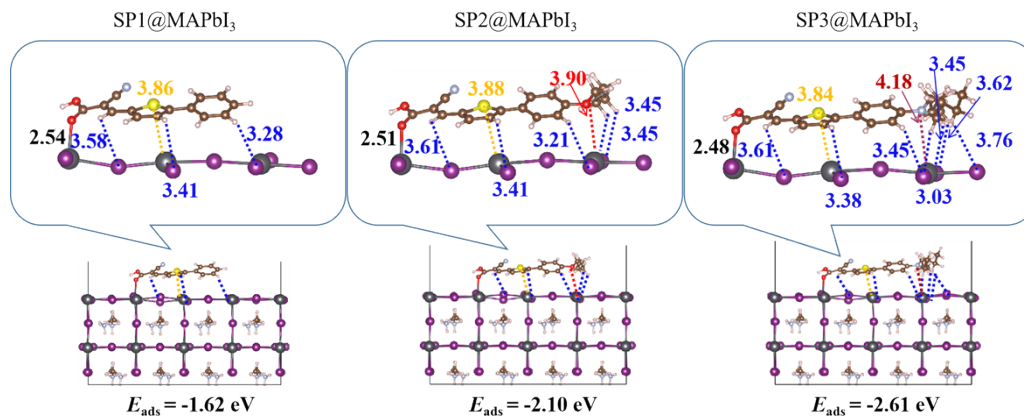

**Fig. S2.** Interfacial structures of SP1@MAPbI<sub>3</sub>, SP2@MAPbI<sub>3</sub>, and SP3@MAPbI<sub>3</sub>. The I-H, S-Pb, N-Pb, and O<sub>d</sub>-Pb bonds are marked in blue, yellow, dark red, and red, respectively. Colour code: red, O; blue, N; bright yellow, S; brown, C; white, H; purple, I; and leaden, Pb.

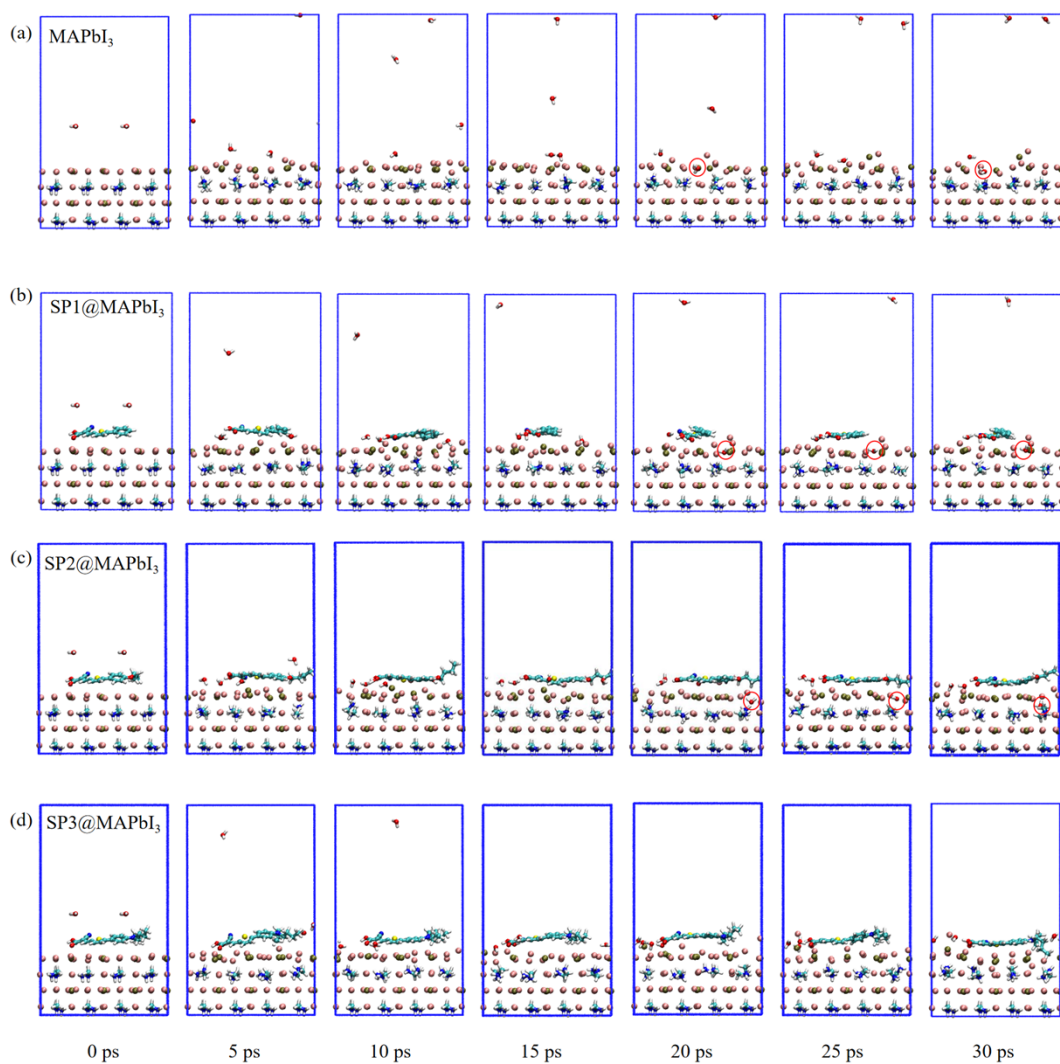

**Fig. S3.** Molecular dynamics of the water interaction with (a) pristine MAPbI<sub>3</sub>, (b) SP1@MAPbI<sub>3</sub>, (c) SP2@MAPbI<sub>3</sub>, and (d) SP3@MAPbI<sub>3</sub>, respectively. Snapshots at 0 ps, 5 ps, 10 ps, 15 ps, 20 ps, 25 ps, and 30 ps are depicted. Water entering the perovskite is highlighted with a red circle. Colour code: red, O; blue, N; bright yellow, S; cyan, C; white, H; pink, I; and dark gold, Pb.

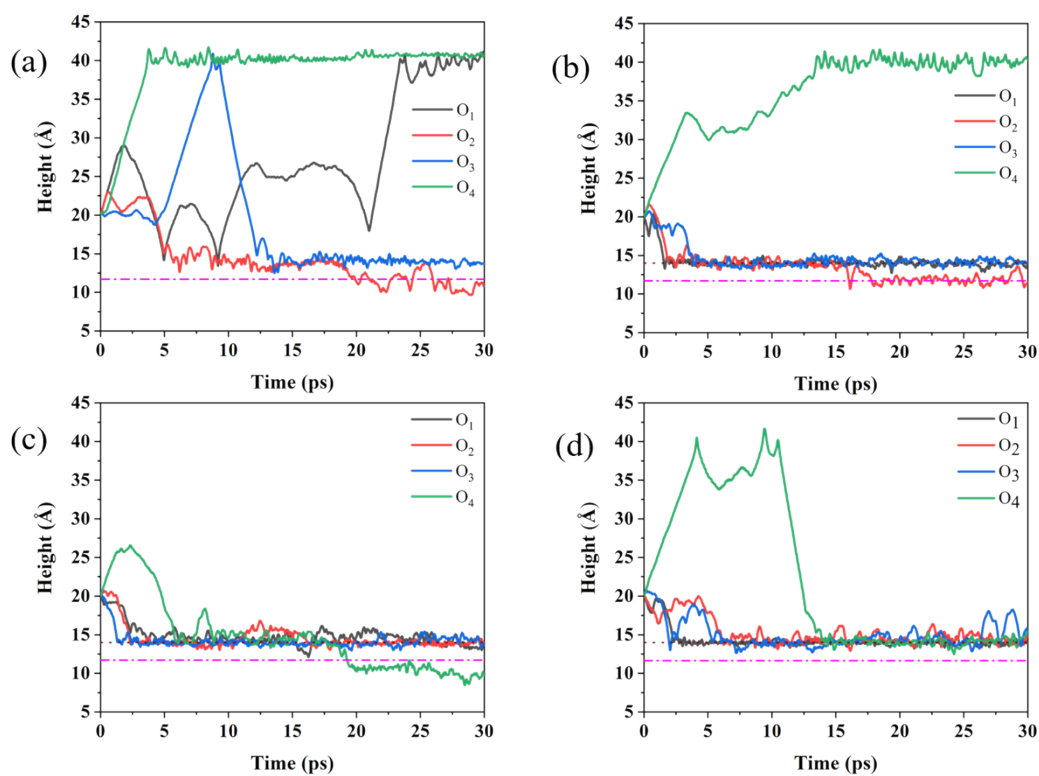

**Fig. S4.** Evolution of the height of the O atoms in water molecules for (a) MAPbI<sub>3</sub>/H<sub>2</sub>O, (b) SP1@MAPbI<sub>3</sub>/H<sub>2</sub>O, (c) SP2@MAPbI<sub>3</sub>/H<sub>2</sub>O, and (d) SP3@MAPbI<sub>3</sub>/H<sub>2</sub>O systems.
